# Supplementary material for: Association between subjective social status and cardiovascular disease and cardiovascular risk factors: a systematic review and meta-analysis
Source: PubMed Central journal article supplement — BMJ Open. 2016 Mar 18;6(3):e010137. doi: 10.1136/bmjopen-2015-010137 (PMC4800117; doi:10.1136/bmjopen-2015-010137), 2016-03-18
Supplement: bmjopen-2015-010137supp_appendix1.pdf [file bmjopen-2015-010137supp_appendix1.pdf]

# Appendix 1: MacArthur Scales of Subjective Social Status

## Panel A: Societal ladder

Think of this ladder as representing where people stand in the United States.

At the **top** of the ladder are the people who are the best off – those who have the most money, the most education and the most respected jobs. At the **bottom** are the people who are the worst off – who have the least money, least education, and the least respected jobs or no job. The higher up you are on this ladder, the closer you are to the people at the very top; the lower you are, the closer you are to the people at the very bottom.

Where would you place yourself on this ladder?

Please place a large "X" on the rung where you think you stand at this time in your life, relative to other people in the United States.

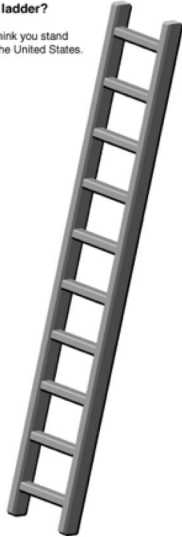

## Panel B: Community ladder

Think of this ladder as representing where people stand in their communities.

People define community in different ways; please define it in whatever way is most meaningful to you. At the **top** of the ladder are the people who have the highest standing in their community. At the **bottom** are the people who have the lowest standing in their community.

Where would you place yourself on this ladder?

Please place a large "X" on the rung where you think you stand at this time in your life, relative to other people in your community.

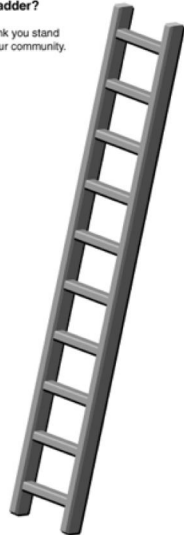

Reproduced with permission from:

<http://www.macses.ucsf.edu/research/psychosocial/usladder.php>  
<http://www.macses.ucsf.edu/research/psychosocial/commladder.php>
