# Supplementary material for: Association between subjective social status and cardiovascular disease and cardiovascular risk factors: a systematic review and meta-analysis
Source: PubMed Central journal article supplement — BMJ Open. 2016 Mar 18;6(3):e010137. doi: 10.1136/bmjopen-2015-010137 (PMC4800117; doi:10.1136/bmjopen-2015-010137), 2016-03-18
Supplement: bmjopen-2015-010137supp_appendix2.pdf [file bmjopen-2015-010137supp_appendix2.pdf]

## Appendix 2: Search Strategy

1. exp Social Class/
2. exp Self Concept/
3. exp Social Perception/
4. 2 or 3
5. 1 and 4
6. (social status\* or social position\* or social standing\* or social class\* or social rank\* or socioeconomic status\* or socioeconomic position\* or socioeconomic standing\* or socioeconomic class\* or socioeconomic rank\*).ti,ab.
7. (perceiv\* or subjective\* or perception\* or belief\*).ti,ab.
8. ((perceiv\* or subjective\* or perception\* or belief\*) adj4 (social status\* or social position\* or social standing\* or social class\* or social rank\* or socioeconomic status\* or socioeconomic position\* or socioeconomic standing\* or socioeconomic class\* or socioeconomic rank\*)).ti,ab.
9. 4 and 6
10. 5 or 8 or 9
11. limit 10 to ("all infant (birth to 23 months)" or "all child (0 to 18 years)")
12. 10 not 11
13. limit 10 to "all adult (19 plus years)"
14. 12 or 13
